# Supplementary material
Source: publisher figshare collection journal article supplement (https://acs.figshare.com/ndownloader/files/5200336)
Supplement: Supplementary file 1 [file 5200336]

**Supporting Information**

**Electrokinetic Trapping and Concentration Enrichment of DNA in a  
Microfluidic Channel**

Jinhua Dai, Takashi Ito, Li Sun, and Richard M. Crooks\*

(3 pages total)

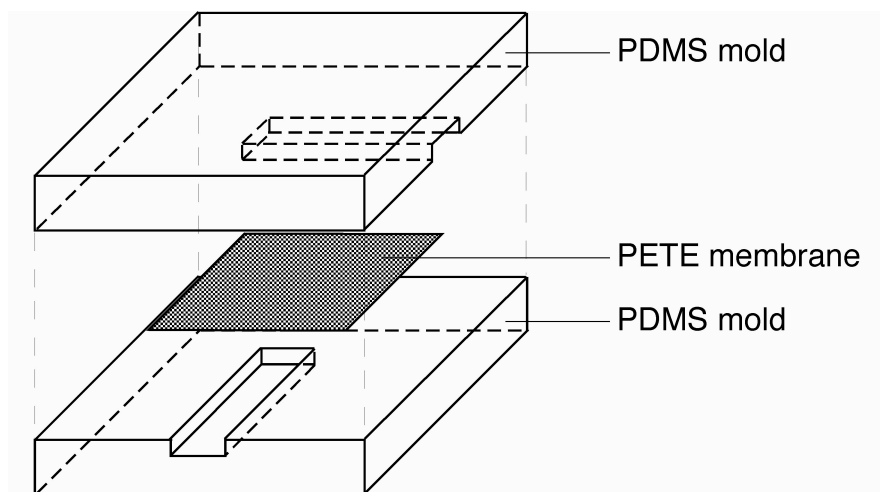

**Disassembled View of a Fluidic Device Used in This Study**

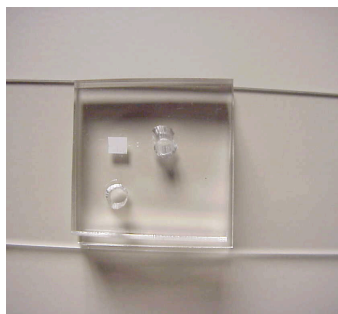

**An optical photo of the device** □

**Figure S1. A scheme (top) showing the fabrication of the device (bottom) used for the observation of concentration.**

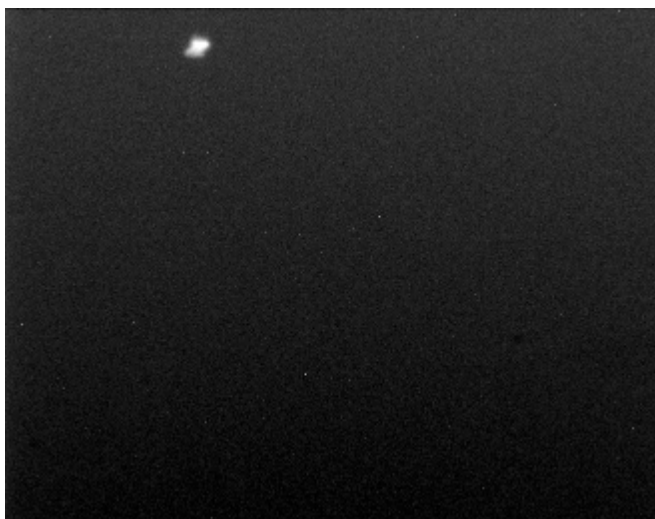

**Movie S1.** Time-resolved fluorescence micrographs showing the DNA enrichment process. All experimental conditions were the same as those used for Figure 1. At the start of this experiment, the PDMS channels were filled with 1x TBE buffer and the source reservoir was loaded with 1x TBE buffer containing 10  $\mu\text{g/mL}$  DNA. Image frames (329x259 pixel resolution) were captured at a rate of about 1 frame/s for a total of 300 s. The movie will play back at a rate of 3 frames/s so that the total **show time** is 100 s.

| Show Time | Real Time | Bias Voltage   | Major Event             |
|-----------|-----------|----------------|-------------------------|
| 0 s       | 0 s       | forward: 100 V | Enrichment and Trapping |
| 30 s      | 90 s      | reverse: 100 V | Transfer and Trapping   |
| 37 s      | 111 s     | forward: 100 V | Enrichment and Trapping |
| 60 s      | 180 s     | reverse: 100 V | Transfer and Trapping   |
| 77 s      | 231 s     | forward: 100 V | Enrichment and Trapping |
